# Supplementary material for: Guideline Concordance of Statin Treatment Decisions: A Retrospective Cohort Study
Source: MDPI journal article supplement (doi:10.3390/jcm9113719), 2020-11-19
Supplement: s1 [file s1]

## Supplementary Material

Operators: ^, “starting with”; |, logical OR

**Supplementary Table S1.** Operationalization of the cardiovascular risk categories according to the 2016 European Society of Cardiology Guidelines. The implementation of the cardiovascular risk categories in the FIRE database is described in detail in Meier et al. (Meier, R.; Rachamin, Y.; Rosemann, T.; Markun, S. The Impact of the 2019 European Guideline for Cardiovascular Risk Management: A Cross-Sectional Study in General Practice. *J. Clin. Med.* 2020, 9, 2140).

| ESC Risk Category | Operationalization Based on Morbidities and SCORE                                                                                                                                                                                                                                                                                                                                   |
|-------------------|-------------------------------------------------------------------------------------------------------------------------------------------------------------------------------------------------------------------------------------------------------------------------------------------------------------------------------------------------------------------------------------|
| Very high risk    | Atherosclerotic cardiovascular disease   diabetes mellitus with target organ damage   diabetes mellitus with a major risk factor   severe chronic kidney disease   SCORE <sup>1</sup> ≥10% single risk factors (very high blood pressure or cholesterol)   diabetes mellitus without risk factors/target damage   moderate chronic kidney disease   SCORE <sup>1</sup> ≥5% and <10% |
| High risk         |                                                                                                                                                                                                                                                                                                                                                                                     |
| Moderate risk     | SCORE <sup>1</sup> ≥1 and <5                                                                                                                                                                                                                                                                                                                                                        |
| Low risk          | SCORE <sup>1</sup> < 1                                                                                                                                                                                                                                                                                                                                                              |

Abbreviations: SCORE, Systematic Coronary Risk Estimation. <sup>1</sup>The SCORE directly provides prognostic probabilities for fatal cardiovascular events based on gender, age (40–70 years), smoking status, parametric values of systolic blood pressure (120–180 mmHg) and total cholesterol (4–8 mmol/L) in untreated patients without cardiovascular disease.

**Supplementary Table S2.** Definition of morbidities.

| Morbidities                            | Operationalization Based on ATC Code, ICPC-2 code, Laboratory Measurements or Vital Values                                                                                                                                        |
|----------------------------------------|-----------------------------------------------------------------------------------------------------------------------------------------------------------------------------------------------------------------------------------|
| Atherosclerotic cardiovascular disease | Any of the following: <ul style="list-style-type: none"> <li>ICPC-2 = K74   K75   K76   K89   K90   K91   K92</li> <li>ATC code B01AC04   B01AC22   B01AC25   B01AC24</li> </ul>                                                  |
| Diabetes mellitus                      | Any of the following: <ul style="list-style-type: none"> <li>ICPC-2 = T89   T90</li> <li>Glycated hemoglobin &gt; 6.5%</li> <li>ATC code ^A10</li> </ul>                                                                          |
| Severe chronic kidney disease          | Glomerular filtration rate < 30 mL/min/1.73 m <sup>2</sup>                                                                                                                                                                        |
| Moderate chronic kidney disease        | Glomerular filtration rate <60 and ≥30 mL/min/1.73 m <sup>2</sup>                                                                                                                                                                 |
| Hypertension                           | Any of the following: <ul style="list-style-type: none"> <li>ICPC-2 = K85   K86   K87</li> <li>two blood pressure measurements &gt; 140/90 mmHg</li> <li>ATC code ^C02   ^C03A   C03EA01   ^C07   ^C08   ^C09A   ^C09B</li> </ul> |
| Obesity                                | Any of the following: <ul style="list-style-type: none"> <li>ICPC-2 = T82</li> <li>Body mass index &gt; 30 kg/m<sup>2</sup></li> </ul>                                                                                            |

Abbreviations: ATC, Anatomical Therapeutic Chemical; ICPC-2, International Classification of Primary Care 2<sup>nd</sup> edition.

**Supplementary Table S3.** Description of patients for whom statin initiation is recommended, stratified by guideline concordance of the treatment decision.

| Variable                                                            | Concordant<br>(n = 531) | Undertreatment<br>(n = 2882) |
|---------------------------------------------------------------------|-------------------------|------------------------------|
| Median deviation of LDL-C from treatment thresholds (IQR) in mmol/L | 1.9 (1.1–2.8)           | 1.3 (0.7–2.0)                |
| % at very high risk (vs. high risk)                                 | 61.8                    | 53.5                         |
| % female                                                            | 48.2                    | 49.2                         |
| Median age at index (IQR)                                           | 67 (59–73)              | 67 (58–75)                   |
| Continuity of care                                                  |                         |                              |

|                         |            |            |
|-------------------------|------------|------------|
| % COCI = 1              | 65.2       | 65.8       |
| % COCI < 1              | 27.7       | 33.0       |
| % missings <sup>1</sup> | 7.2        | 1.2        |
| GP characteristics      |            |            |
| % female GPs            | 22.2       | 13.6       |
| Median age of GPs (IQR) | 51 (43–59) | 54 (47–60) |

---

Abbreviations: LDL-C, low-density lipoprotein cholesterol; IQR, interquartile range; CV, cardiovascular; COCI, continuity of care index; GP, general practitioner. <sup>1</sup> For patients with only one consultation, no COCI could be calculated.
